# Supplementary material for: Insights into flibanserin oxidative stress degradation pathway: in silico – in vitro toxicity assessment of its degradates
Source: Royal Society of Chemistry journal article supplement (doi:10.1039/d0nj05548d), 2021-01-01
Supplement: d0nj05548d1.pdf [file d0nj05548d1.pdf]

## SUPPLEMENTARY MATERIAL

### Insights into Flibanserin Stress Degradation Pathway: *In silico* – *In vitro* Toxicity Assessment of Its Degradates

Mohammed F. El-Beairy<sup>a</sup>, Rasha M. Ahmed<sup>b</sup>, Marwa A.A. Fayed<sup>c</sup>, Samar Mowafy<sup>b</sup>, Inas A. Abdallah<sup>d#</sup>

<sup>a</sup>Department of Organic and Medicinal Chemistry, Faculty of Pharmacy, University of Sadat City, Sadat City 32897, Egypt.

<sup>b</sup>Department of Pharmaceutical Chemistry, Faculty of Pharmacy, Misr International University, Cairo 11341, Egypt.

<sup>c</sup>Department of Pharmacognosy, Faculty of Pharmacy, University of Sadat City, Sadat City 32897, Egypt.

<sup>d</sup>Department of Analytical Chemistry, Faculty of Pharmacy, University of Sadat City, Sadat City 32897, Egypt.

# Corresponding author

**Inas A. Abdallah**

Department of Analytical Chemistry, Faculty of Pharmacy, University of Sadat City, Sadat City, Egypt

E-mail: [inas.abdallah@fop.usc.edu.eg](mailto:inas.abdallah@fop.usc.edu.eg)

## Table of Contents

|                                                                                                                    |     |
|--------------------------------------------------------------------------------------------------------------------|-----|
| <b>Figure S1</b> UV Spectrum of Flibanserin.....                                                                   | S3  |
| <b>Figure S2</b> <sup>1</sup> H NMR Spectrum of Flibanserin.....                                                   | S4  |
| <b>Figure S3</b> <sup>1</sup> H NMR Spectrum of DP 1.....                                                          | S5  |
| <b>Figure S4</b> <sup>1</sup> H NMR Spectrum of DP 2.....                                                          | S6  |
| <b>Figure S5</b> Postulated mechanism of formation of DP 1&2.....                                                  | S7  |
| <b>Figure S6</b> Coefficient plots for method robustness .....                                                     | S8  |
| <b>Figure S7</b> The expected ADMET study .....                                                                    | S9  |
| <b>Table S1</b> System suitability parameters for Flibanserin in the presence of its DPs.....                      | S10 |
| <b>Table S2</b> Design of experiment (DOE) for Flibanserin robustness testing.....                                 | S11 |
| <b>Table S3</b> <i>In vitro</i> cytotoxicity assay of Flibanserin and its degradation products on HSF cell line... | S12 |

**Figure S1- UV Spectrum of Flibanserin**

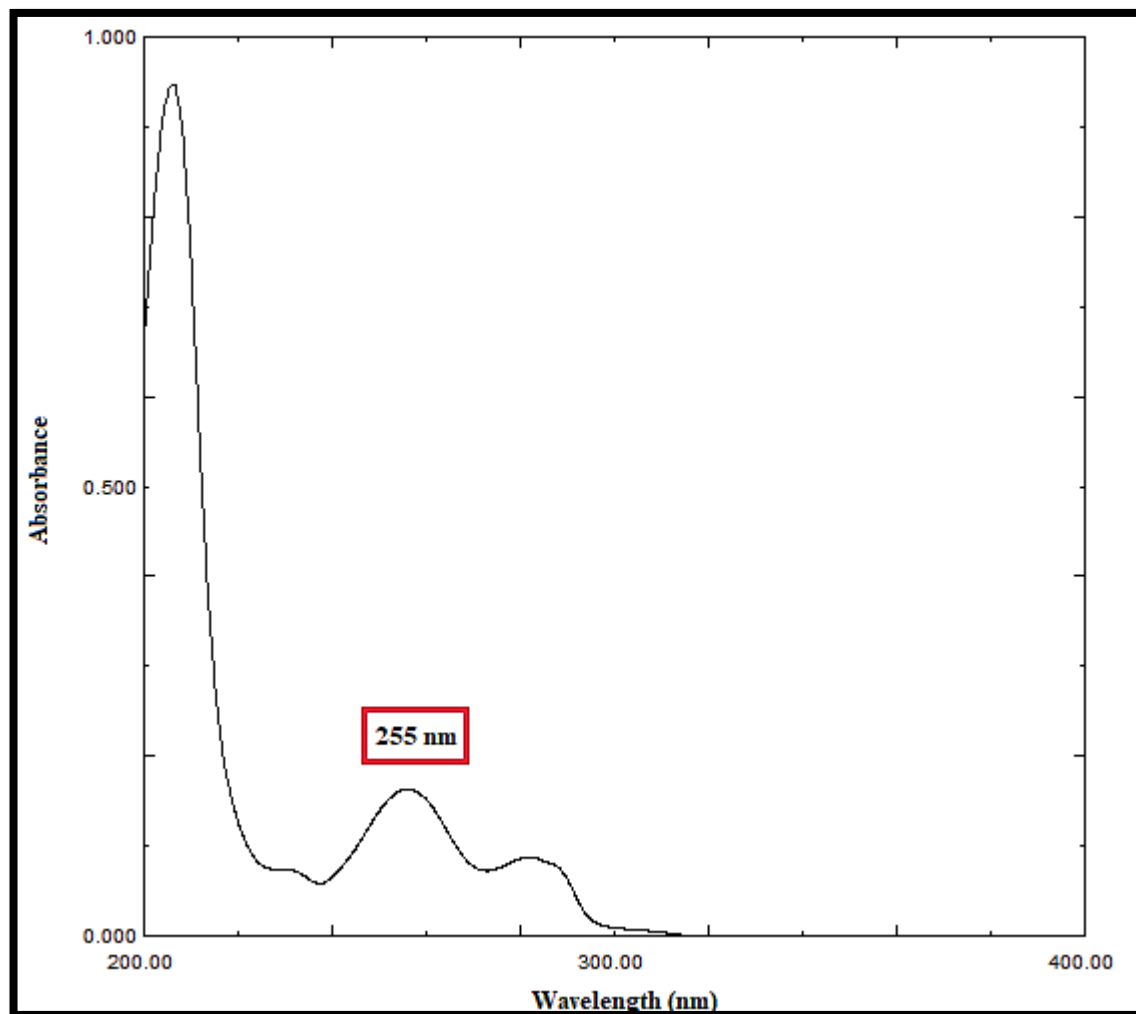

Figure S2-<sup>1</sup>H NMR Spectrum of Flibanserin

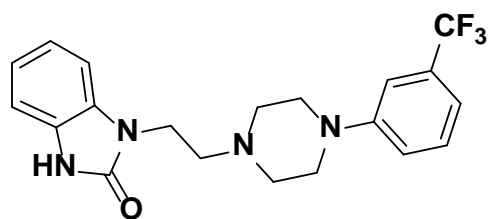

Flibanserin

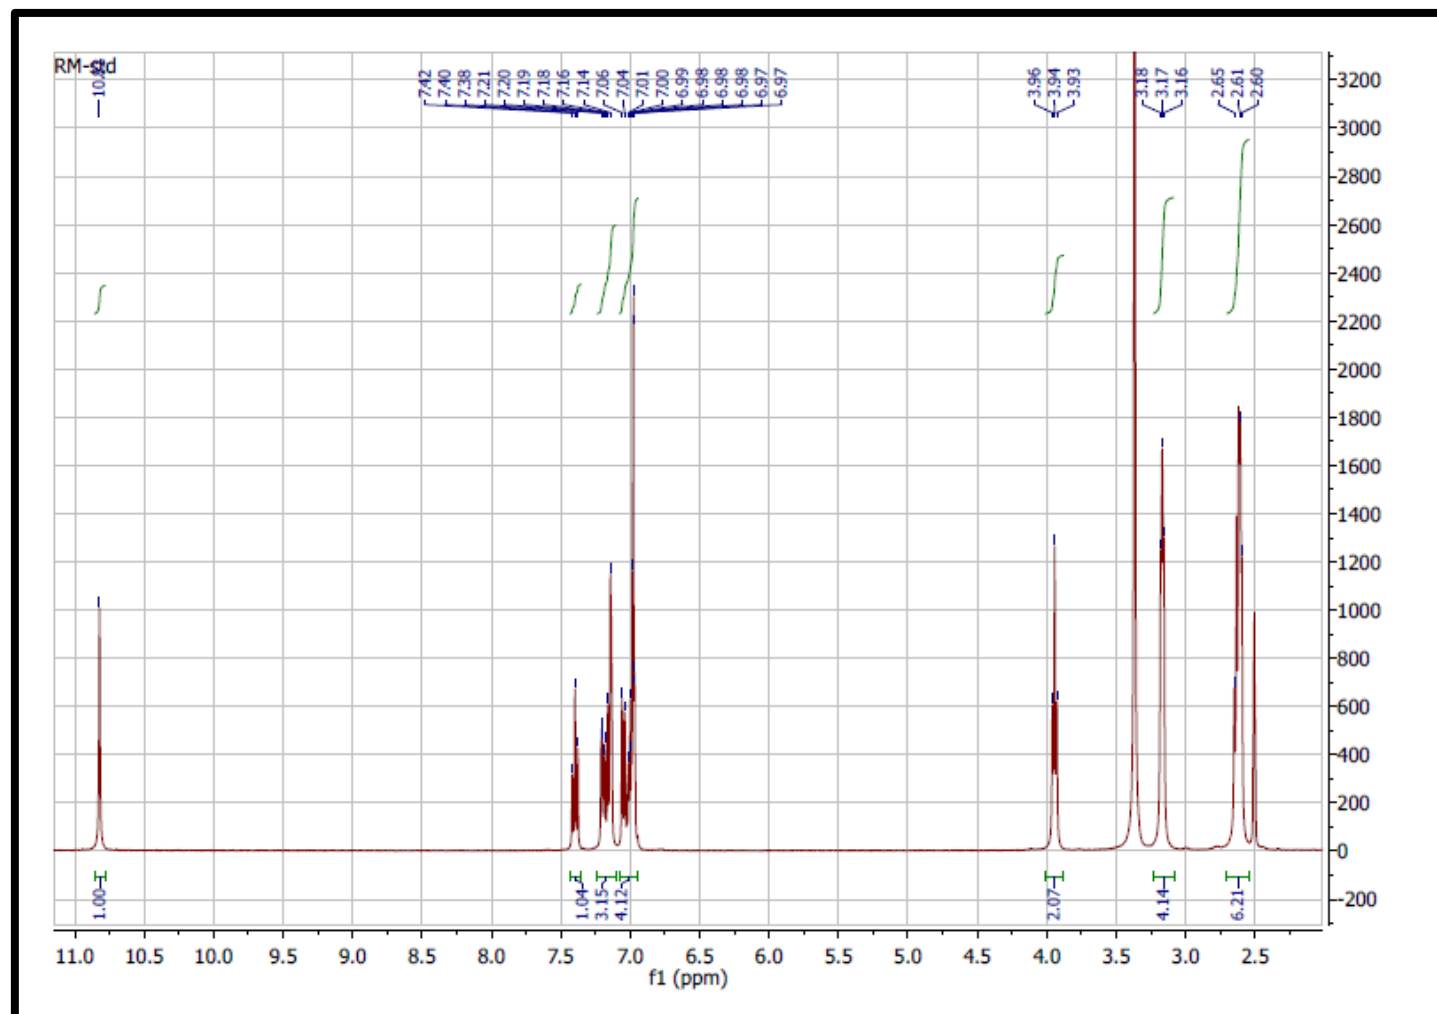



Figure S4-<sup>1</sup>H NMR Spectrum of DP 2

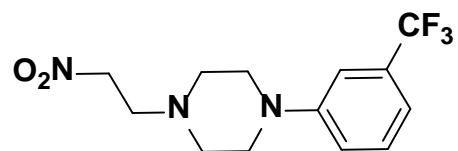

DP 2

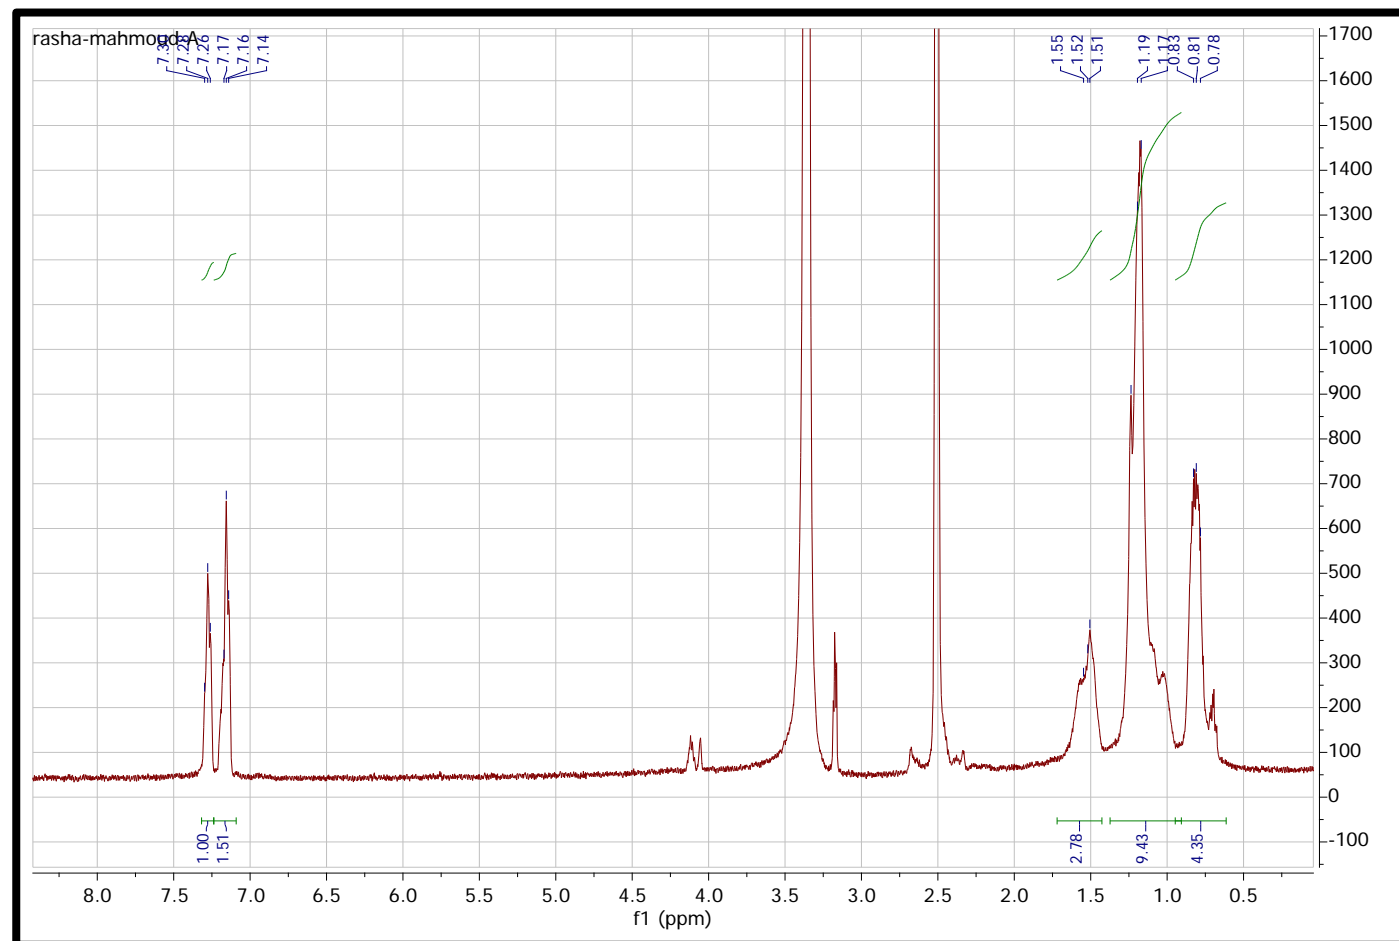

**Figure S5- Postulated Mechanism of formation of DP 1&2**

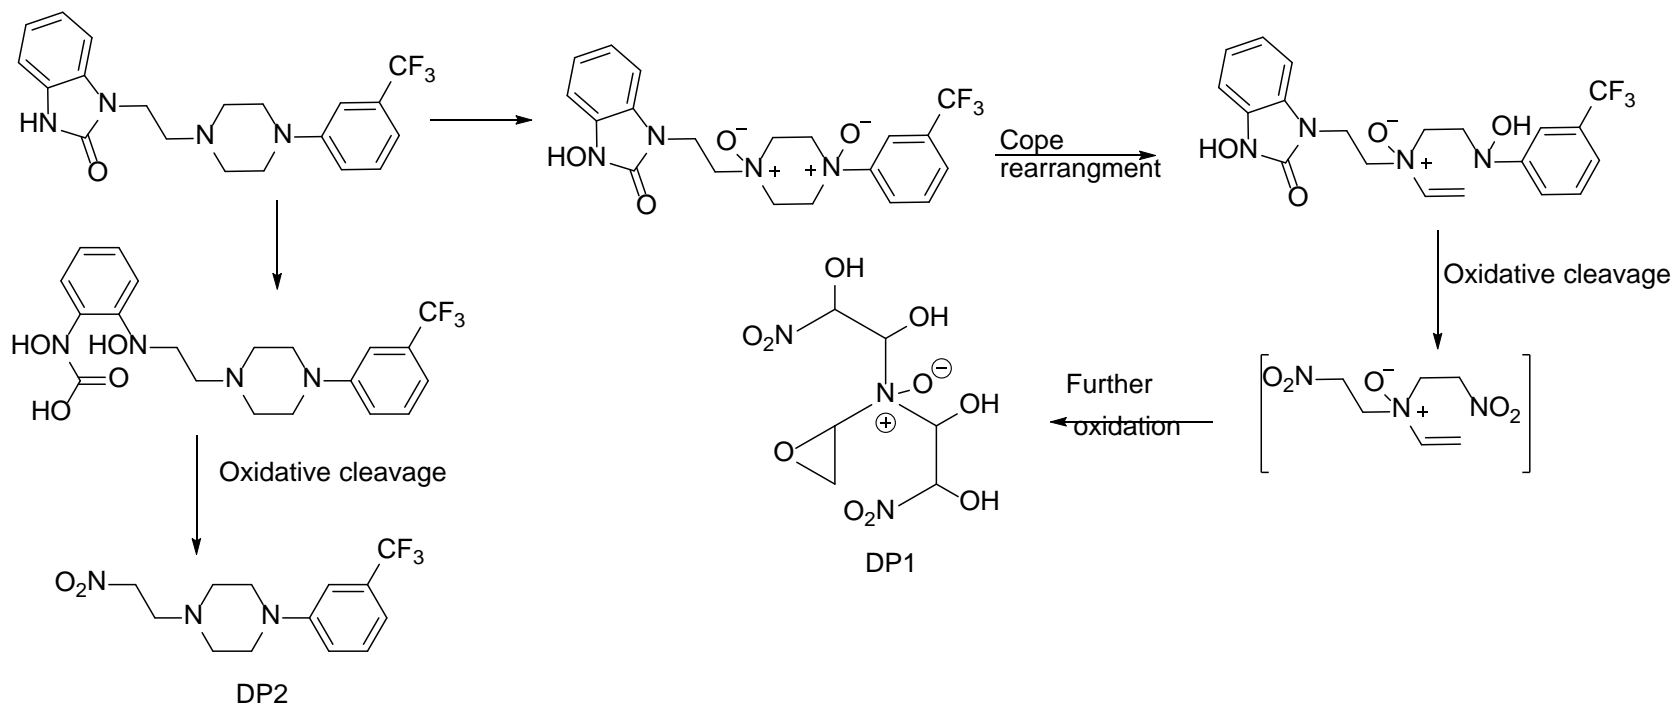

Figure S6- Coefficient plots for method robustness

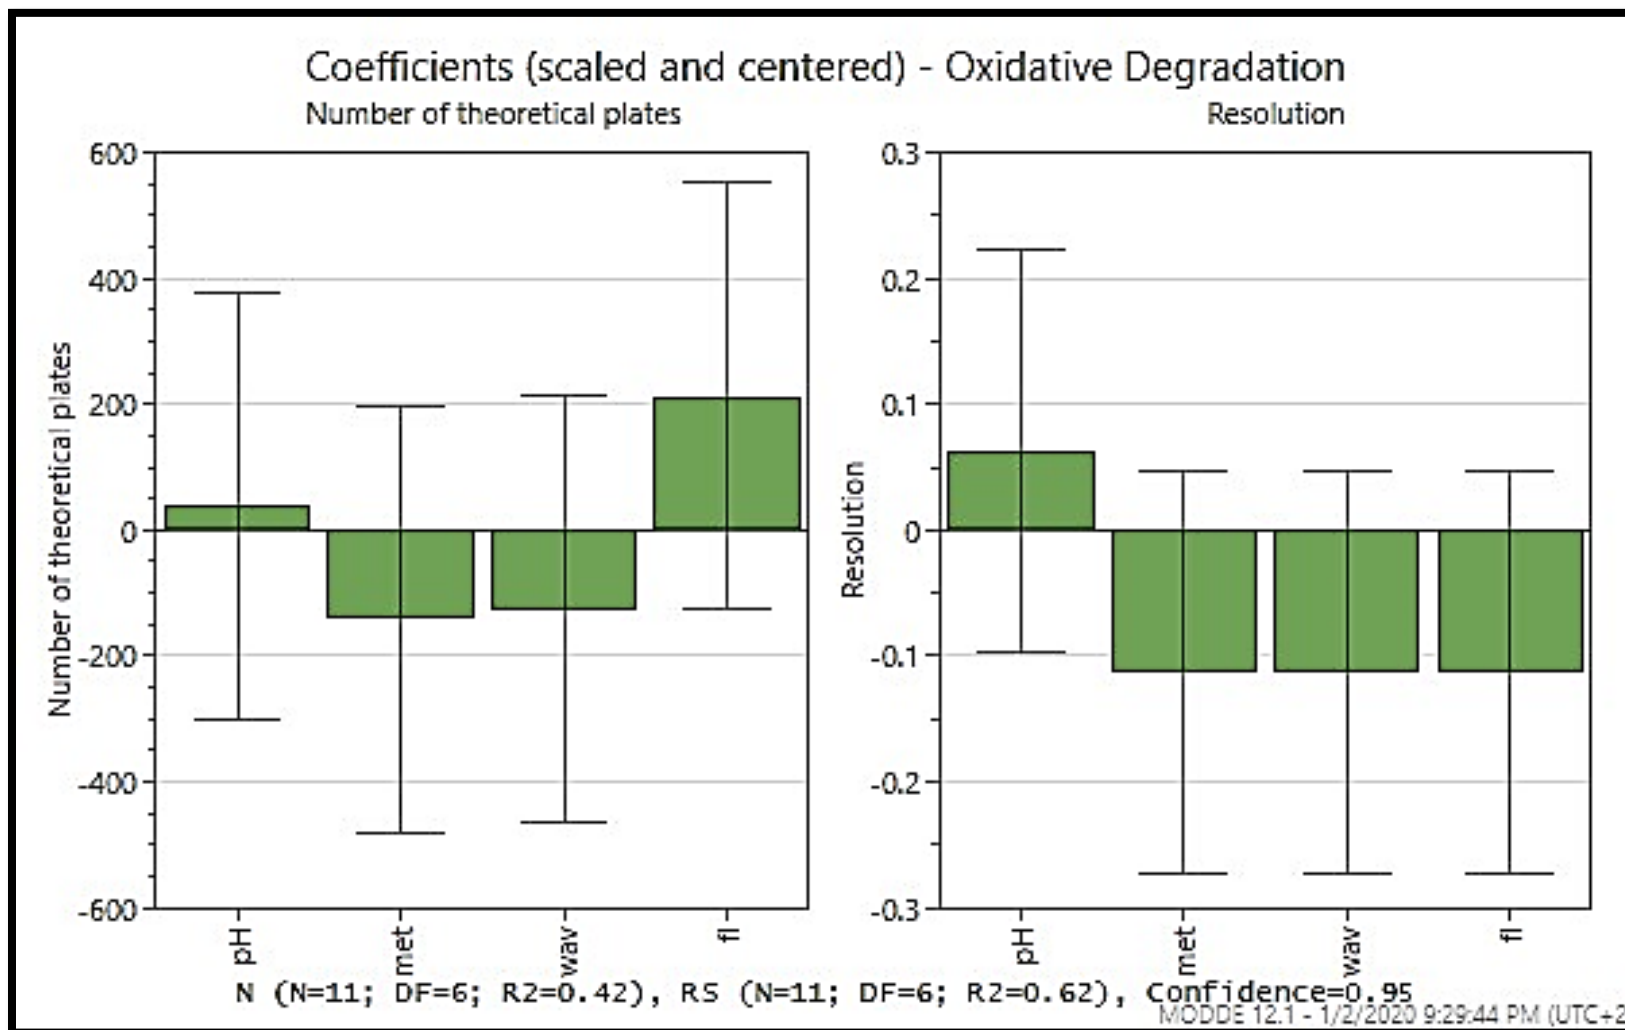



**Figure S7- The expected ADMET study**

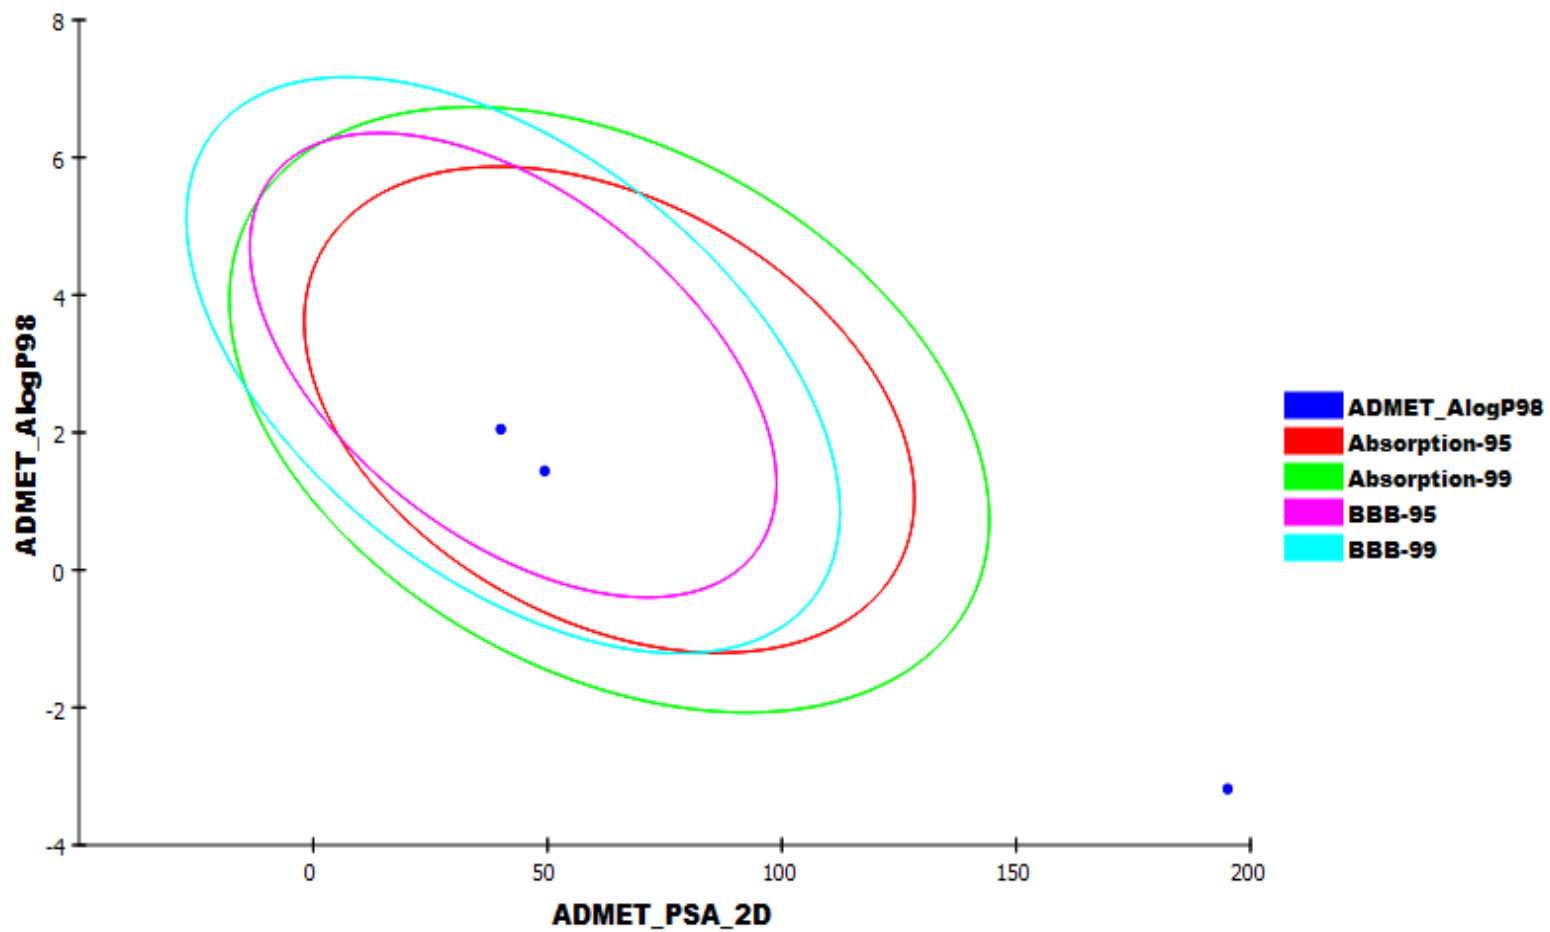

**Table S1- System suitability parameters for Flibanserin in the presence of its oxidative DPs**

| <b>Parameter</b>                 | <b>Flibanserin</b> |
|----------------------------------|--------------------|
| <b>Resolution</b>                | 4.7                |
| <b>No. of theoretical plates</b> | 4339               |
| <b>Capacity factor</b>           | 2.2                |
| <b>Symmetry</b>                  | 0.83               |

**Table S2- Design of experiment (DOE) for Flibanserin robustness testing**

| <b>Exp. No</b> | <b>pH</b> | <b>methanol</b> | <b>Wavelength</b> | <b>Flow rate</b> |
|----------------|-----------|-----------------|-------------------|------------------|
| 1              | 4.2       | 88              | 253               | 1.2              |
| 2              | 4.2       | 92              | 253               | 0.8              |
| 3              | 4.2       | 92              | 257               | 0.8              |
| 4              | 3.8       | 92              | 257               | 1.2              |
| 5              | 4.2       | 88              | 257               | 1.2              |
| 6              | 3.8       | 92              | 253               | 1.2              |
| 7              | 3.8       | 88              | 257               | 0.8              |
| 8              | 3.8       | 88              | 253               | 0.8              |
| <b>9</b>       | <b>4</b>  | <b>90</b>       | <b>255</b>        | <b>1</b>         |
| <b>10</b>      | <b>4</b>  | <b>90</b>       | <b>255</b>        | <b>1</b>         |
| <b>11</b>      | <b>4</b>  | <b>90</b>       | <b>255</b>        | <b>1</b>         |

**Table S3- *In vitro* cytotoxicity of Fibanserin and its degradation products on HSF cell line**

| Fibanserin   | Raw data |       |        | Blank Corrected Data |       |              | Viability %     |        |             | Mean   | STD       |
|--------------|----------|-------|--------|----------------------|-------|--------------|-----------------|--------|-------------|--------|-----------|
|              | 1        | 2     | 3      | 1                    | 2     | 3            | 1               | 2      | 3           |        |           |
| Conc.        |          |       |        |                      |       |              |                 |        |             |        |           |
| <b>c</b>     | 2.285    | 2.257 | 2.271  | 2.254                | 2.226 | 2.24         | 100             | 100    | 100         | 100    | 0         |
| <b>0.01</b>  | 2.284    | 2.281 | 2.287  | 2.253                | 2.25  | 2.256        | 100.58          | 100.45 | 100.71      | 100.58 | 0.1093522 |
| <b>0.1</b>   | 2.2675   | 2.262 | 2.273  | 2.2365               | 2.231 | 2.242        | 99.844          | 99.598 | 100.09      | 99.844 | 0.2004791 |
| <b>1</b>     | 2.201    | 2.196 | 2.207  | 2.17                 | 2.165 | 2.176        | 96.875          | 96.652 | 97.143      | 96.89  | 0.200755  |
| <b>10</b>    | 2.188    | 2.177 | 2.166  | 2.157                | 2.146 | 2.135        | 96.295          | 95.804 | 95.313      | 95.804 | 0.4009581 |
| <b>100</b>   | 2.151    | 2.13  | 2.1405 | 2.12                 | 2.099 | 2.1095       | 94.643          | 93.705 | 94.174      | 94.174 | 0.3827328 |
| <b>Blank</b> | 0.031    | 0.031 | 0.031  | Blank Average        |       | <b>0.031</b> | Control average |        | <b>2.24</b> |        |           |

| DP 1         | Raw data |        |       | Blank Corrected Data |        |              | Viability %     |        |              | Mean   | STD       |
|--------------|----------|--------|-------|----------------------|--------|--------------|-----------------|--------|--------------|--------|-----------|
|              | 1        | 2      | 3     | 1                    | 2      | 3            | 1               | 2      | 3            |        |           |
| Conc.        |          |        |       |                      |        |              |                 |        |              |        |           |
| <b>c</b>     | 2.249    | 2.275  | 2.301 | 2.218                | 2.244  | 2.27         | 100             | 100    | 100          | 100    | 0         |
| <b>0.01</b>  | 2.209    | 2.2315 | 2.244 | 2.178                | 2.2005 | 2.213        | 97.059          | 98.061 | 98.619       | 97.913 | 0.645356  |
| <b>0.1</b>   | 2.151    | 2.155  | 2.147 | 2.12                 | 2.124  | 2.116        | 94.474          | 94.652 | 94.296       | 94.474 | 0.1455431 |
| <b>1</b>     | 2.11     | 2.157  | 2.204 | 2.079                | 2.126  | 2.173        | 92.647          | 94.742 | 96.836       | 94.742 | 1.710131  |
| <b>10</b>    | 2.079    | 2.071  | 2.061 | 2.048                | 2.04   | 2.03         | 91.266          | 90.909 | 90.463       | 90.879 | 0.328145  |
| <b>100</b>   | 2.008    | 2.047  | 2.091 | 1.977                | 2.016  | 2.06         | 88.102          | 89.84  | 91.8         | 89.914 | 1.5109223 |
| <b>Blank</b> | 0.031    | 0.031  | 0.031 | Blank Average        |        | <b>0.031</b> | Control average |        | <b>2.244</b> |        |           |

| DP 2         | Raw data |       |       | Blank Corrected Data |       |              | Viability %     |        |               | Mean   | STD       |
|--------------|----------|-------|-------|----------------------|-------|--------------|-----------------|--------|---------------|--------|-----------|
|              | 1        | 2     | 3     | 1                    | 2     | 3            | 1               | 2      | 3             |        |           |
| Conc.        |          |       |       |                      |       |              |                 |        |               |        |           |
| <b>c</b>     | 2.362    | 2.363 | 2.362 | 2.331                | 2.332 | 2.331        | 100             | 100    | 100           | 100    | 0         |
| <b>0.01</b>  | 2.286    | 2.274 | 2.298 | 2.255                | 2.243 | 2.267        | 96.726          | 96.211 | 97.24         | 96.726 | 0.4202728 |
| <b>0.1</b>   | 2.195    | 2.244 | 2.147 | 2.164                | 2.213 | 2.116        | 92.822          | 94.924 | 90.764        | 92.837 | 1.6986325 |
| <b>1</b>     | 2.1665   | 2.171 | 2.162 | 2.1355               | 2.14  | 2.131        | 91.6            | 91.793 | 91.407        | 91.6   | 0.1576023 |
| <b>10</b>    | 2.136    | 2.164 | 2.109 | 2.105                | 2.133 | 2.078        | 90.292          | 91.493 | 89.134        | 90.306 | 0.9631781 |
| <b>100</b>   | 2.083    | 2.082 | 2.085 | 2.052                | 2.051 | 2.054        | 88.018          | 87.975 | 88.104        | 88.033 | 0.0534981 |
| <b>Blank</b> | 0.031    | 0.031 | 0.031 | Blank Average        |       | <b>0.031</b> | Control average |        | <b>2.3313</b> |        |           |

| <b>Dox</b>   | Raw data |       |       | Blank Corrected Data |       |              | Viability %     |        |              |        |           |
|--------------|----------|-------|-------|----------------------|-------|--------------|-----------------|--------|--------------|--------|-----------|
| Conc.        | 1        | 2     | 3     | 1                    | 2     | 3            | 1               | 2      | 3            | Mean   | STD       |
| <b>c</b>     | 2.146    | 2.133 | 2.159 | 2.115                | 2.102 | 2.128        | 100             | 100    | 100          | 100    | 0         |
| <b>0.01</b>  | 1.845    | 1.848 | 1.842 | 1.814                | 1.817 | 1.811        | 85.768          | 85.91  | 85.626       | 85.768 | 0.1158151 |
| <b>0.1</b>   | 1.476    | 1.432 | 1.454 | 1.445                | 1.401 | 1.423        | 68.322          | 66.241 | 67.281       | 67.281 | 0.8493109 |
| <b>1</b>     | 0.707    | 0.723 | 0.691 | 0.676                | 0.692 | 0.66         | 31.962          | 32.719 | 31.206       | 31.962 | 0.6176806 |
| <b>10</b>    | 0.072    | 0.073 | 0.072 | 0.041                | 0.042 | 0.041        | 1.9385          | 1.9858 | 1.9385       | 1.9543 | 0.0222886 |
| <b>100</b>   | 0.0545   | 0.055 | 0.054 | 0.0235               | 0.024 | 0.023        | 1.1111          | 1.1348 | 1.0875       | 1.1111 | 0.0193025 |
| <b>Blank</b> | 0.031    | 0.031 | 0.031 | Blank Average        |       | <b>0.031</b> | Control average |        | <b>2.115</b> |        |           |
